# Supplementary material
Source: PubMed Central journal article supplement (PMC4305339)

**SUPPLEMENTAL INFORMATION for**

**The nuclear receptor NR2E1/TLX controls senescence**

Ana O'Loughlen, Nadine Martin, Benjamin Krusche, Helen Pemberton, Marta M. Alonso, Hollie Chandler, Sharon Brookes, Simona Parrinello, Gordon Peters and Jesús Gil

**Including:**

**Supplemental Table 1.** Primary antibodies used in this study.

**Supplemental Table 2.** Primers for qRT-PCR and Taqman probes used in this study.

**Supplemental Table 3.** Sequence of siRNA and shRNA targeting NR2E1 used in this study.

**Supplemental Table 4.** Primers sets used for CHIP analysis.

**Supplemental Table 5.** Primers sets used for DPA analysis.

**Supplemental Figure legends**

**Supplemental Table 1.** Primary antibodies used in this study.

| <b>Target</b>        | <b>Reference</b>                   |
|----------------------|------------------------------------|
| NR2E1                | H6506, R&D systems                 |
| CBX6                 | Ref. 44                            |
| CBX7                 | Ab21873, Abcam                     |
| CBX8                 | A300-882A, Bethyl Laboratories     |
| FLAG                 | M2, Sigma                          |
| BrdU                 | A21303, Invitrogen                 |
| p16 <sup>INK4a</sup> | JC-8, CRUK                         |
| p21 <sup>CIP1</sup>  | CP74, Sigma                        |
| $\beta$ -Actin       | sc-47778, Santa Cruz Biotechnology |
| $\alpha$ -Tubulin    | T6074, Sigma                       |

**Supplemental Table 2.** Primers for qRT-PCR and Taqman probes used in this study.**Primers for qPCR****Human****Target**

| Target | Forward primer          | Reverse primer         |
|--------|-------------------------|------------------------|
| p16    | CGGTCCGAGGCCGATCCAG     | GCGCCGTGGAGCAGCAGCAGCT |
| p21    | CCTGTCACTGTCTTGTACCCT   | GCGTTTGGAGTGGTAGAAATCT |
| RPS14  | TCACCGCCCTACACATCAAACCT | CTGCGAGTGCTGTCAAGAGG   |

**Reverse primer****Mouse****Target**

| Target | Forward primer      | Reverse primer         |
|--------|---------------------|------------------------|
| p16    | GTGTGCATGACGTGCGGG  | GCAGTTCGAATCTGCACCGTAG |
| p21    | CCTGGTGATGTCCGACCTG | CCATGAGCGCATCGCAATC    |
| Rps14  | GACCAAGACCCCTGGACCT | CCCCTTTTCTTCGAGTGCTA   |

**Reverse primer****TaqMAN probes****Human****Target**

| Target | Applied Biosystems Reference |
|--------|------------------------------|
| CBX2   | Hs01034268_m1                |
| CBX4   | Hs01106873_m1                |
| CBX6   | Hs00982441_g1                |
| CBX7   | Hs00545603_m1                |
| CBX8   | Hs00221034_m1                |
| NR2E1  | Hs01128417_m1                |
| TBP    | 4333769F                     |
| RNU6B  | 1093                         |

**Mouse****Target**

| Target | Applied Biosystems Reference |
|--------|------------------------------|
| Cbx7   | Mm00520005_m1                |
| Nr2e1  | Mm00455855_m1                |
| Tbp    | Mm00446971_m1                |

**Supplemental Table 3.** Sequence of siRNA and shRNA targeting NR2E1 used in this study.**siRNA**

|              | <b>Reference</b> | <b>Target sequence</b> |
|--------------|------------------|------------------------|
| <b>Human</b> |                  |                        |
| siNR2E1.2    | SI00050106       | TCCCGTTAACATAGTGCTGAA  |
| <b>Mouse</b> |                  |                        |
| siNr2e1.4    | SI00239400       | TTGGGTATGAATCTATACTTA  |
| siNr2e1.5    | SI02698094       | TACCAGCTTTACGGTCAATTA  |

**shRNA****Human**

shNR2E1.2

GATCCCCCAGAACTGAGTTAATAAGTGATTCAAGAGATCACTTATTAAGTCAGTTCTGTTTTTA

shNR2E1.3

GATCCCCTCCCGTTAACATAGTGCTGAATTCAGCACTATGTTAACGGGATTTTTTA

**Mouse**

shNr2e1.4

CCGGCGTGGACACAAGGAAGACAATCTCGAGATTGTCTTCCTTGTGTCCACGTTTTT

shNr2e1.5

CCGGCCGGTTGATGCTAACACTCTACTCGAGTAGAGTGTTAGCATCAACCGGTTTTT

**Supplemental Table 4.** Primers sets used for ChIP analysis.

| <b>Primer</b> | <b>Forward primer</b> | <b>Reverse primer</b> |
|---------------|-----------------------|-----------------------|
| <b>CBX7</b>   |                       |                       |
| PS2           | GAGGGAGAGGGAGAGGAAGA  | GAGCCATCGGATTCCATCTA  |
| PS3           | CCTGTCCTCCTCTTGACTGC  | AACGGATCCAGTGAGGTGAG  |
| <b>CDKN1A</b> |                       |                       |
| PS            | TAGGGGAATGGTGAAAGGTG  | TGAAAGCTGACTGCCCCTAT  |
| <b>NR2E1</b>  |                       |                       |
| PS2           | GCAGGATTTTTCCCCCTTTA  | CCACACAGAGGGACTGCTCT  |
| PS3           | CCTTCTTTCCTTGGGAGACC  | CTTTTTCCCCATTCTGTCA   |
| PS4           | GCAGAGAGGGTCGTCTTGTC  | CCTCTGAGGTCCATGAAAGC  |

**Supplemental Table 5.** Primers sets used for DPA analysis.**Probe Forward oligonucleotide**

0 GGGCGGATGGAGGGGTGGGTGGACGGACGTGGAGACACTGGCCA  
 1 AACTGCGCCGCGGAGAAGGCCGGATTAGGGAGACCTCGGCCCTG  
 2 CGACGTCCGACACGGTGGGAAGCCTTTTGGGTCCCGGCTCTCC  
 3 TGCAACTCGAGGGGCTGCGCCTCGGGCCCAGTCTCCTCCGCTGC  
 4 GGGAGGTGAGCAAATGGCCTCCCCGCTCTGAGCCTTGACTTTGT  
 4.mut GGGAGGTGAGCAAATGGCCTCCCCGCTCTGAGCCTCAGTCCTGT  
 5 CGTCGGCTCCACTGGGCCCTGCCACTTCGGCCCCTGGCAGTCAC  
 6 CGGGAGGCTATGAGGCGCCCGCCTGGGTATTAAGGATCACGTCC  
 7 CGCCCCGGCGTACAGCAAGACGGGGCGCGGAGCCTCCGCCCC  
 8 GCCCCAGCCGGTGACCGAGCCAAATAAGTCCCACGGCAGCGCTC  
 9 GCGGCTCGCGGCCCGCGGCCCAATCGCAACCCGCGGGGGCGGGC  
 10 CCCGGGGGCGGGGTTCCGATGGGGGCGGGGCTCGGGGGCGGAGC  
 11 TGACCCTCAGGGCGCGAGCCGAGCCCGCGGCCGTTCCGCGCGCT  
 12 CCCGCCCCGCCCTCCTTGCGCGCGCTCGCTCGCTGGCGCCGA  
 13 GGAAAACGTTGCGCAGGTTCAAAAATGGAACGTGCGCGGCGTGA  
 14 GGGAGCGCGAGGGGGTGTGCGCGCGTGCAGCGTGCAGCGCGC  
 15 CCGGACGAGGGTGACGGGGACCCCGCCAGCCCCAGCATCGCGCG  
 16 CCGCAGCCGCGGCCCGCAGCTCCGCCCCCGGCCCGGCCCGGCC  
 17 CCGGGCCCGCTCGCCCGCCGCCCGCATGGAGCTGTCAGCCATC  
 18 GGCAGCAGGTGTTCCGCGTGGAGAGCATCCGGAAGAAGCGCGT  
 19 GCGGAAGGTGAGGCTGCCCGGGGGCGGCTCCAGGACCCAGTG  
 20 GGGTCCCTCCCGTCCCAGCACCGCTCCCTCCACGCTGGGGCTG

**Probe Reverse oligonucleotide**

0 TGGCCAGTGTCTCCACGTCCGTCCACCCACCCCTCCATCCGCC  
 1 CAGGGCCGAGGTCTCCCTAATCCGGCCTTCTCCGCGGCGCAGTT  
 2 GGAGAGCCGGGACCCAAAAGGCTTCCCACCGTGTCCGGACGTGC  
 3 GCAGCGGAGGAGACTGGGCCCGAGGCGCAGCCCCTCGAGTTGCA  
 4 **ACAAGTCA**AGGCTCAGAGCGGGGAGGCCATTTGCTCACCTCCC  
 4.mut ACAGGACTGAGGCTCAGAGCGGGGAGGCCATTTGCTCACCTCCC  
 5 GTGACTGCCAGGGGCCGAAGTGGCAGGGCCCAGTGGAGCCGACG  
 6 GGACGTGATCCTTAATACCCAGGCGGGCGCCTCATAGCCTCCCG  
 7 GGGGCGGAGGCTCGCGCGCCCCGTCTTGCTGTGACGCCGGGGCG  
 8 GAGCGCTGCCGTGGGACTTATTTGGCTCGGTACCCGGCTGGGGC  
 9 GCCCGCCCCCGCGGGTTGCGATTGGGCCGCGGGCCGCGAGCCGC  
 10 GCTCCGCCCCCGAGCCCCGCCCCATCGGAACCCCGCCCCCGGG  
 11 AGCGCGCGGAACGGCCGCGGGCTCGGCTCGCGCCCTGAGGGTCA  
 12 TCGGCGCCAGCGAGCGAGCGCGCGCAAGGAGGGGGCGGGGCGGG  
 13 TCACGCCGCCGACGTTCCATTTTTGAACCTGCGCAACGTTTTCC  
 14 GCGCGCACGCGCACGCGCACGCGCACACCCCTCGCGCTCCC  
 15 CGCGCGATGCTGGGGCTGGCGGGGTCCCGTCCACCTCGTCCGG  
 16 GGCCGGGCCGGGCCGGGGCGGAGCTGCGGGGCGCGGCTGCGG  
 17 GATGGCTGACAGCTCCATGCGGGGCGGCGGGCGAGCGGGCCCGG  
 18 ACGCGCTTCTTCCGATGCTCTCCACGGCGAACACCTGCTCGCC  
 19 CACTGGGGTCCTGGGAGCCGCCCGGGCAGCCTCACCTTCCGC  
 20 CAGCCCAGCGTGGAGGGAGCGGTGCTGGGGACGGGAGGGACCC

**Bold:** consensus NR2E1 binding motif

Underlined: mutated sequences

**SUPPLEMENTAL FIGURE LEGENDS****Figure S1. A reporter-based screen identifies NR2E1 as a regulator of CBX7 transcription.**

(a) Re-testing of candidate cDNAs regulating CBX7 transcription using a human CBX7 promoter reporter in HEK283T cells. (b) NR2E1 wt and NR2E1  $\Delta$ 40 are expressed at a similar level. HEK293T cells were transfected with expression vectors for NR2E1 wt or the DNA binding domain mutant NR2E1  $\Delta$ 40 and NR2E1 protein level was checked by immunoblot. (c) Luciferase assay with a human CBX7 promoter reporter showing that NR2E1 activates the human CBX7 promoter through its DNA binding domain.

**Figure S2. Regulation of the CBX7 promoter by NR2E1.**

(a) DNA pulldown assay was performed using the probes described in Sup Table 5 that span the CBX7 human promoter. A preferential binding of NR2E1 to probe 4, that contains a consensus NR2E1 site is shown. A lower signal is detected with probes 8, 9 and 12 suggesting alternative binding sites. The arrow marks the size of the NR2E1 wt band. (b) Luciferase reporter assay using two mouse Cbx7 reporter constructs. -836 was used for the screen, while -536 lacks the homologous region shown to bind NR2E1 in the DPA assay. Luciferase activity is similar, suggesting that alternative binding sites or indirect mechanisms could contribute to Cbx7 activation by NR2E1.

**Figure S3. NR2E1 overexpression inhibits senescence and extends cellular lifespan.**

(a) NR2E1 wt but not NR2E1 DNA binding mutant delays senescence in IMR90 cells. (b) SA- $\beta$ -Galactosidase staining of IMR90 cells infected with the indicated vectors is shown. (c) Mutation in the NR2E1 DNA binding domain impairs its ability to regulate INK4a and CDKN1a. qRT-PCR was performed using RNA from IMR90 cells infected with the indicated constructs. (d) NR2E1 overexpression extends the lifespan of WI-38 cells. WI-38 cells were infected with the indicated vectors. At passage 19, cells were seeded at low density, grown for 2 weeks and crystal violet, SA-

$\beta$ -Galactosidase and BrdU staining were performed.

**Figure S4. Knockdown of NR2E1 inhibits the proliferation of human fibroblasts and prostate epithelial cells (HPrEC).**

(a) Cartoon locating the sequences of human NR2E1 targeted by the different shRNA and siRNA used in this study. (b) NR2E1 knockdown by shRNA inhibits cell proliferation in IMR90. IMR90 cells were infected with two different shRNA vectors targeting NR2E1 or with a control vector, knockdown efficiency was checked by qRT-PCR (left) and growth curves were performed (right). (c) NR2E1 knockdown in HPrEC causes a decrease in CBX7 mRNA level. HPrEC were transfected with siNR2E1.2 or a scrambled sequence and the mRNA levels of NR2E1 and CBX7 were assessed by qRT-PCR 5 days later. (d) Knocking down NR2E1 in HPrEC results in premature senescence. HPrEC were transfected with siNR2E1.2 or a scrambled sequence. 5 days after transfection cells were fixed and subjected to IF to count relative cell numbers (left) and the percentage of p16<sup>INK4a</sup> (middle) and p21<sup>CIP1</sup> (right) positive cells. (e) Knockdown efficiency of shRNA vectors targeting p16<sup>INK4a</sup> (shp16) or p21<sup>CIP1a</sup> (shp21) used in Figure 5e, as assessed by qRT-PCR for p16<sup>INK4a</sup> (left) and p21<sup>CIP1</sup> IF (right).

**Figure S5. Effect of NR2E1 in neural cells.**

(a) Cartoon locating the sequences of mouse Nr2e1 targeted by the different shRNA and siRNA used in this study. (b) Nr2e1 knockdown by shRNA in mouse neural stem cells (NSC) downregulates *Cbx7* and upregulates *Ink4a* and *Cdkn1a*. NSC were infected with shRNA vectors targeting Nr2e1 or with a control empty vector, selected and qRT-PCR were performed 2 days later.



a

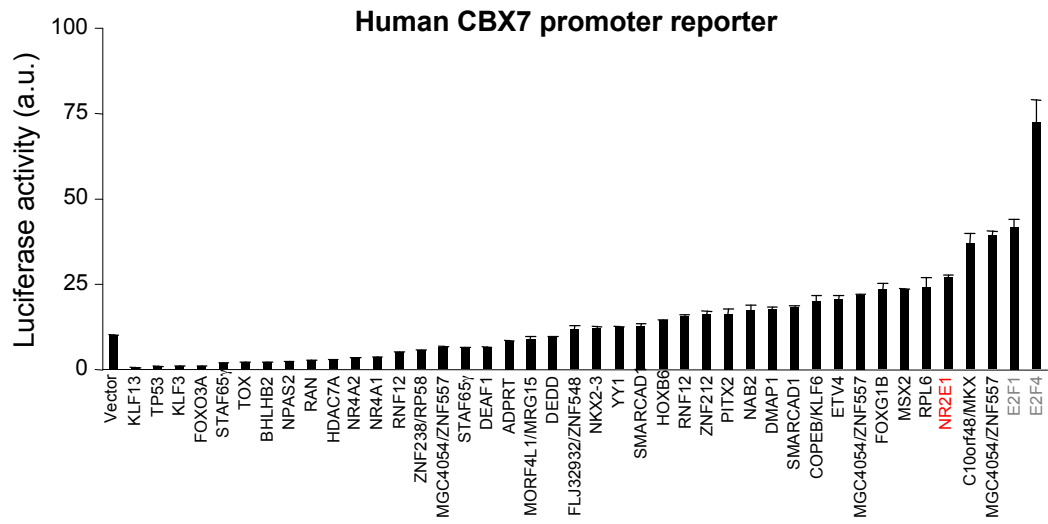

b

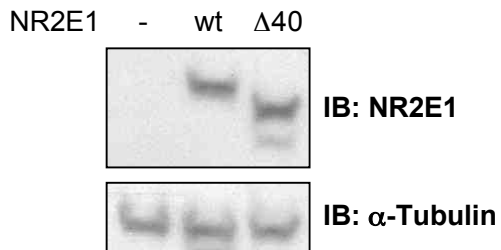

c

**Human CBX7 promoter reporter**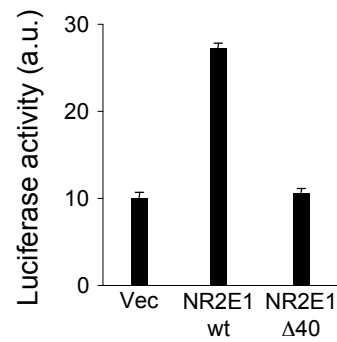

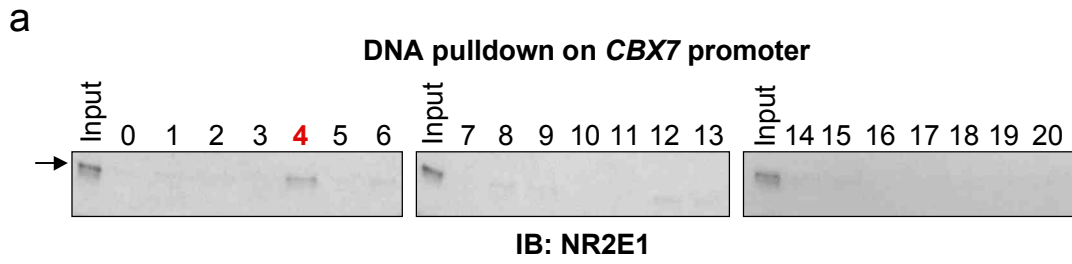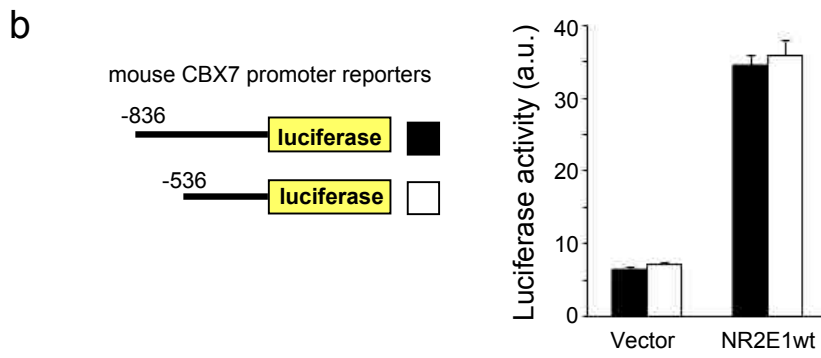

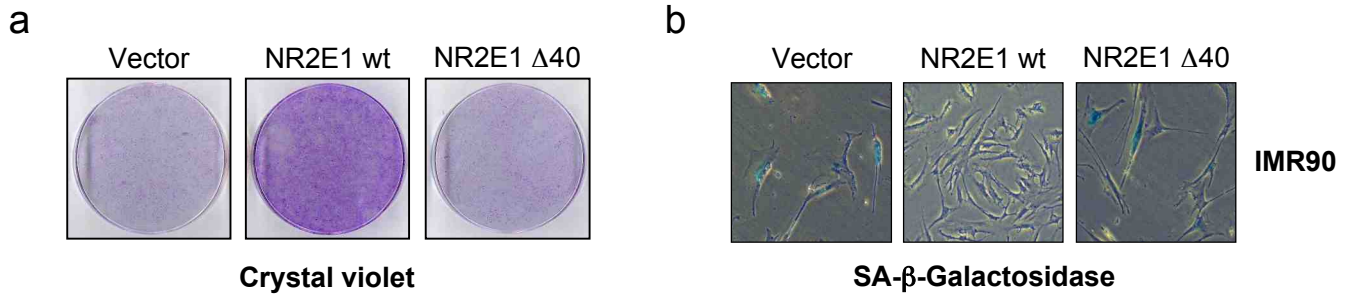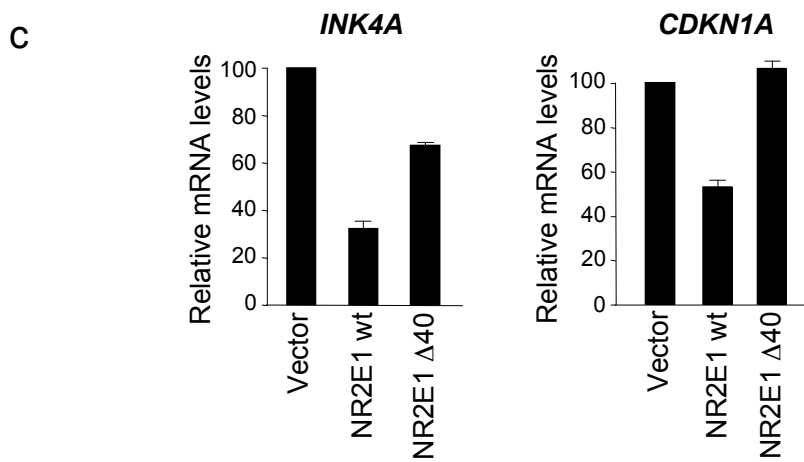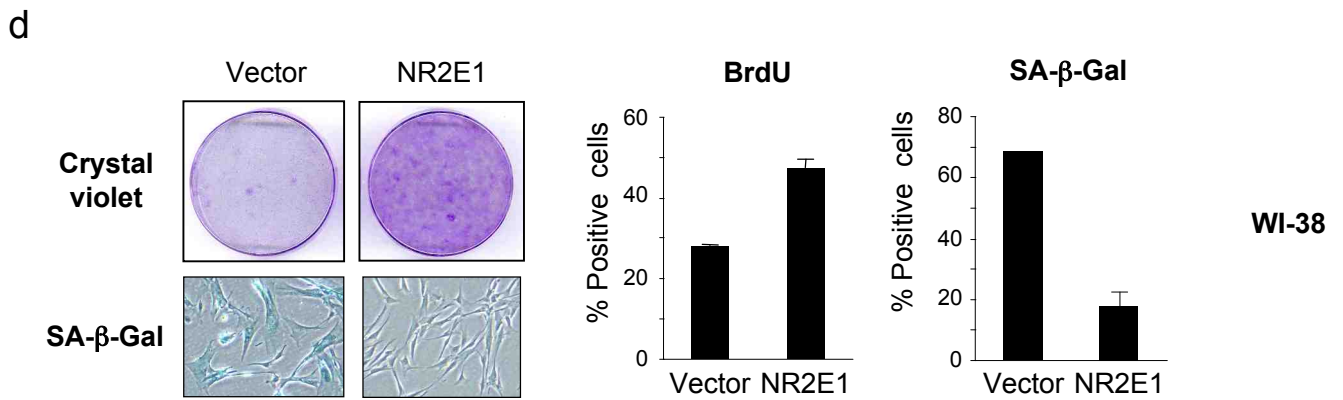

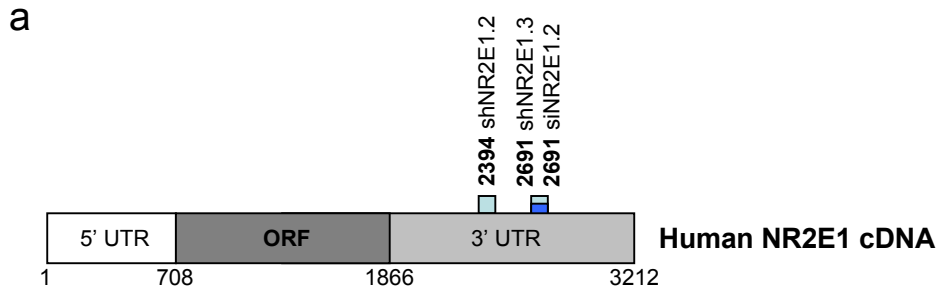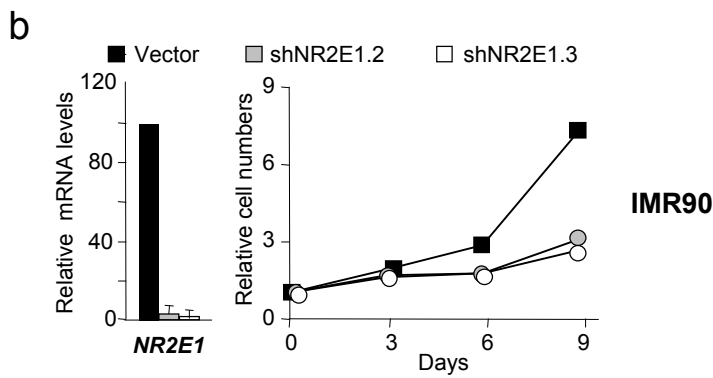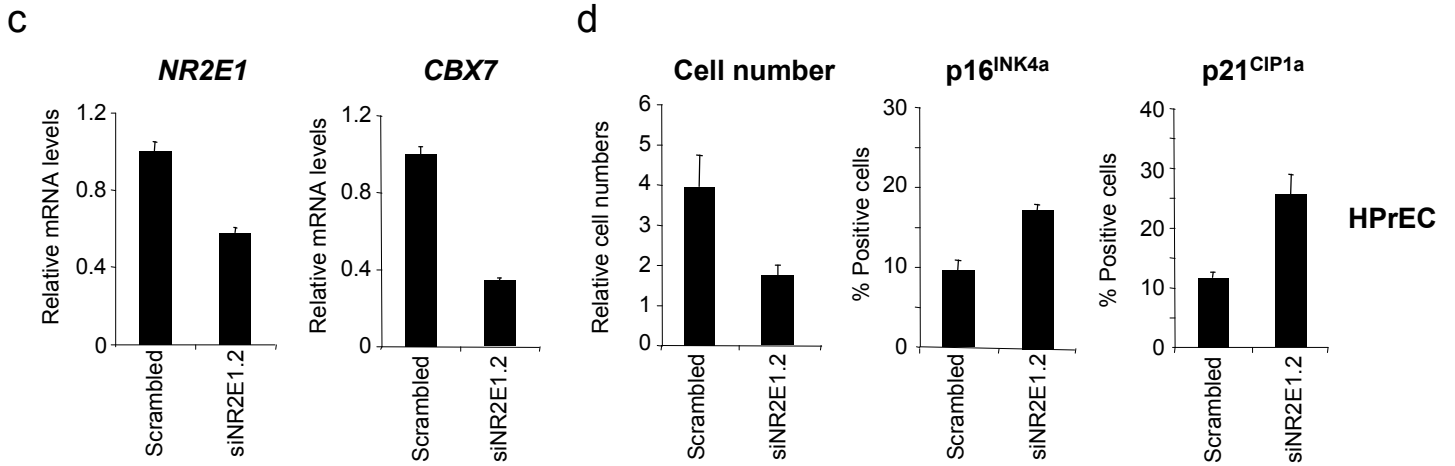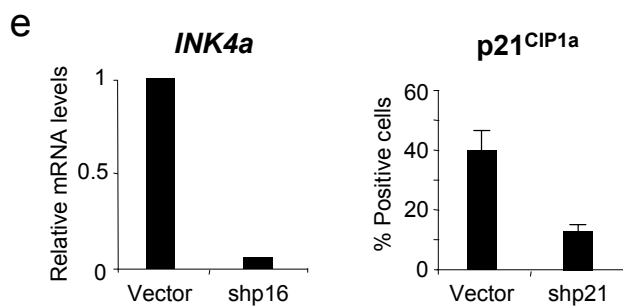

**a**

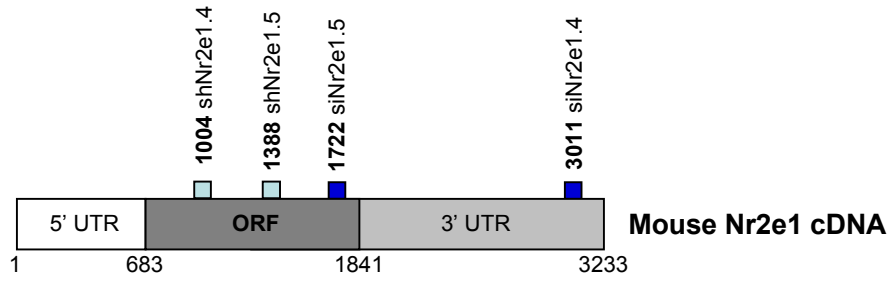

**b**

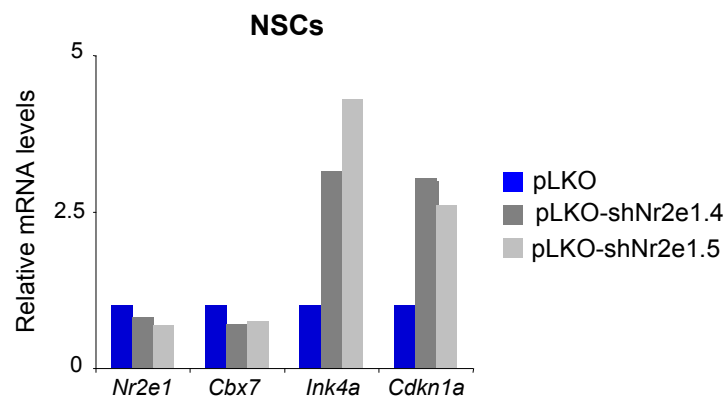

Supplement: NIHMS60315-supplement-1.pdf [file NIHMS60315-supplement-1.pdf]
